# Supplementary material for: Time-dependent stereoselective Heck reaction using mesoporous Pd/TiO2nanoparticles catalyst under sunlight
Source: Royal Society of Chemistry journal article supplement (doi:10.1039/c3cy00602f), 2013-10-30

## Electronic Supplementary Material

# Time Dependent Stereoselective Heck Reaction using Mesoporous Pd/TiO<sub>2</sub> nanoparticles catalyst under Sunlight

Saurabh S. Soni,\*<sup>a</sup> Deepali Kotadia<sup>a</sup>

*Department of Chemistry, Sardar Patel University, Vallabh Vidyanagar – 388 120, Gujarat,*

*INDIA. Tel: +91-226856 ext. 216; Email: soni\_b21@yahoo.co.in*

**Figure S1** TEM micrographs of Pd doped titania mesoporous materials

**Figure S2** SEM micrographs of Pd doped titania mesoporous materials

**Figure S3** EDS report of Pd doped titania mesoporous materials

**Figure S4** FTIR spectra of Pd doped titania mesoporous materials

**Table S1** The Heck Coupling reactions of Aryl halides with Alkenes<sup>a</sup>

**Figure S5** GC-MS spectra of 1,2-diphenylethene (Stilbene)

**Figure S6** <sup>1</sup>H and <sup>13</sup>C NMR of Z-1,2-diphenylethene (Stilbene)

**Figure S7** <sup>1</sup>H and <sup>13</sup>C NMR of Z-4-(3-tert-butoxy-3-oxoprop-1-enyl)benzoic acid

**Figure S8** <sup>1</sup>H and <sup>13</sup>C NMR of Z-tert-butyl 3-(4-methoxyphenyl)acrylate

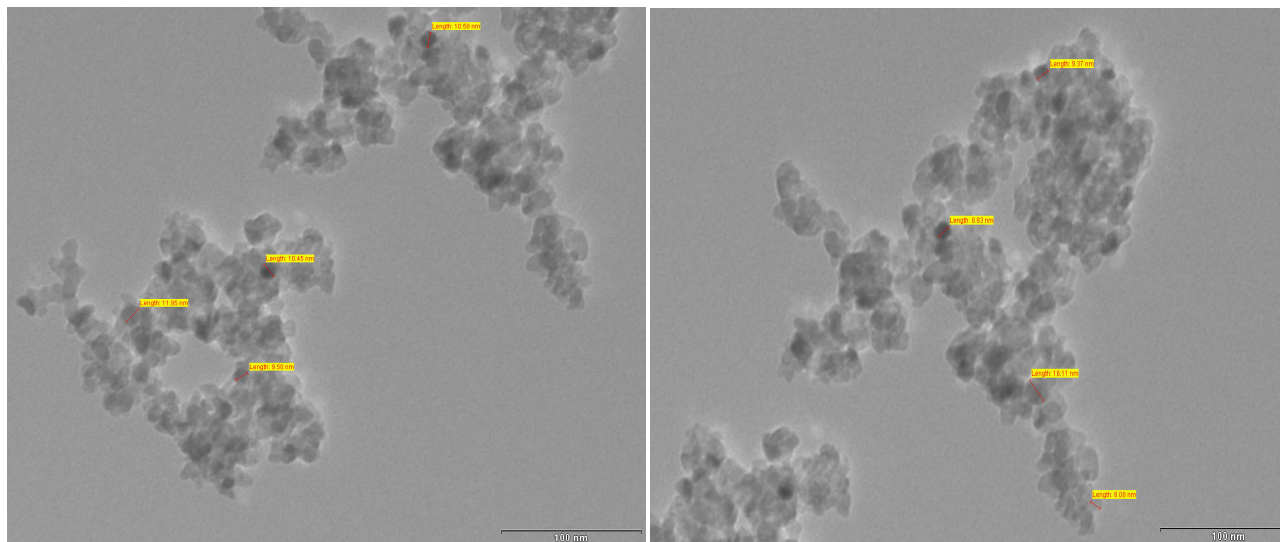

**Figure S1** TEM micrographs of Pd doped titania mesoporous materials

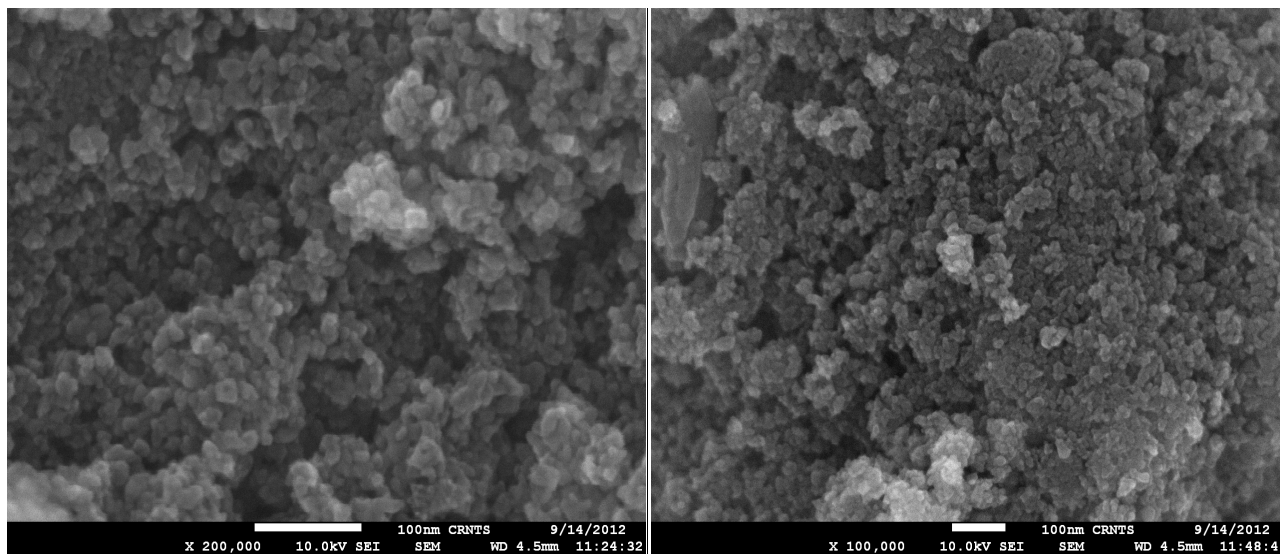

**Figure S2** SEM micrographs of Pd doped titania mesoporous materials

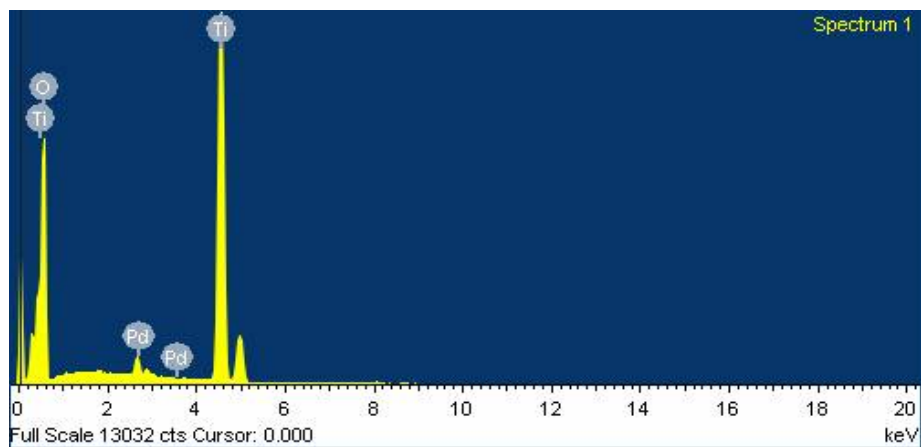

Figure S3 EDS report of Pd doped titania mesoporous materials

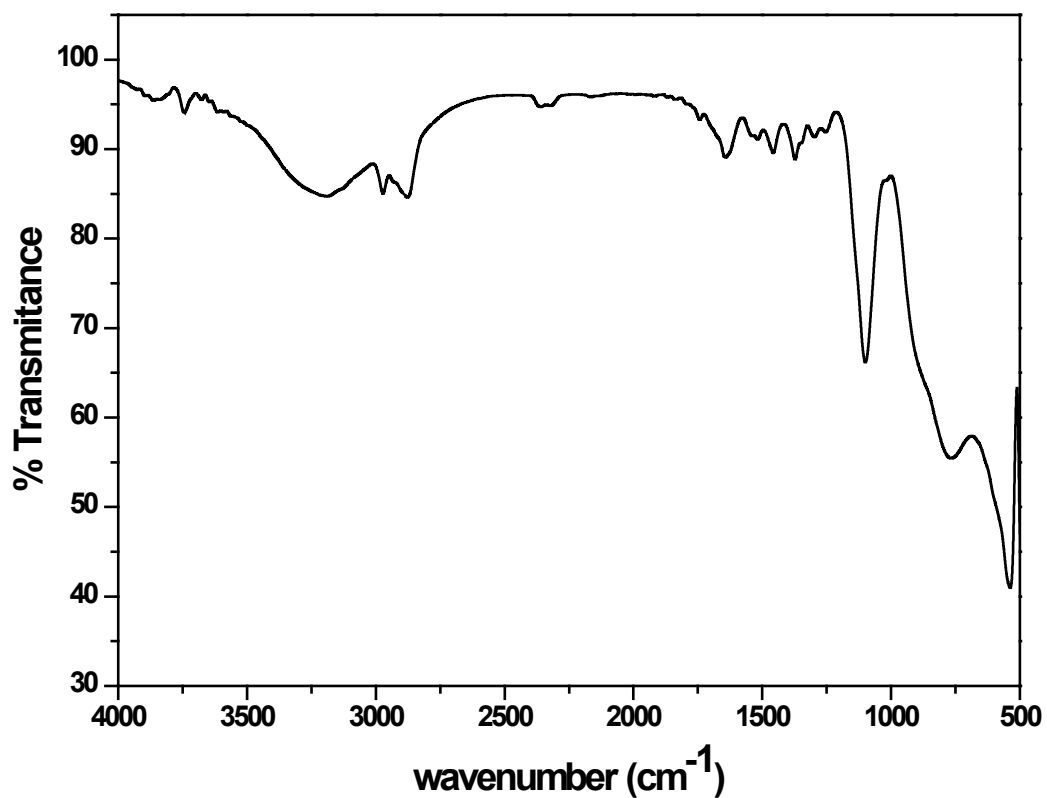

Figure S4 FTIR spectra of Pd doped titania mesoporous materials

**Table S1** The Heck Coupling reactions of Aryl halides with Alkenes<sup>a</sup>

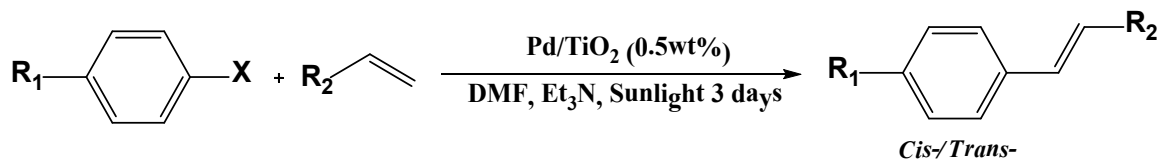

| Entry | R <sub>1</sub>    | R <sub>2</sub>                                   | X  |
|-------|-------------------|--------------------------------------------------|----|
| 1     | -H                | -C <sub>6</sub> H <sub>5</sub>                   | I  |
| 2     | -OCH <sub>3</sub> | -C <sub>6</sub> H <sub>5</sub>                   | I  |
| 3     | -COOH             | -C <sub>6</sub> H <sub>5</sub>                   | I  |
| 4     | -H                | -C <sub>6</sub> H <sub>5</sub>                   | Br |
| 5     | -COOH             | -C <sub>6</sub> H <sub>5</sub>                   | Br |
| 6     | -H                | -CO <sub>2</sub> C <sub>4</sub> H <sub>9-t</sub> | Br |
| 7     | -H                | -CO <sub>2</sub> C <sub>4</sub> H <sub>9-t</sub> | I  |
| 8     | -COOH             | -CO <sub>2</sub> C <sub>4</sub> H <sub>9-t</sub> | I  |
| 9     | -OCH <sub>3</sub> | -CO <sub>2</sub> C <sub>4</sub> H <sub>9-t</sub> | I  |

<sup>a</sup> Reaction conditions- Aryl halides (1.28mmol), Alkenes (1.66mmol), Triethylamine (2.56mmol), Dodecane (40mg, as internal standard), Pd/TiO<sub>2</sub> (0.5 wt% of Pd) and DMF (5ml) under sunlight for 3 days at ~45°C.

## Characterization of Heck Coupling product

Figure S5 GC-MS spectra of 1,2-diphenylethene (Stilbene)

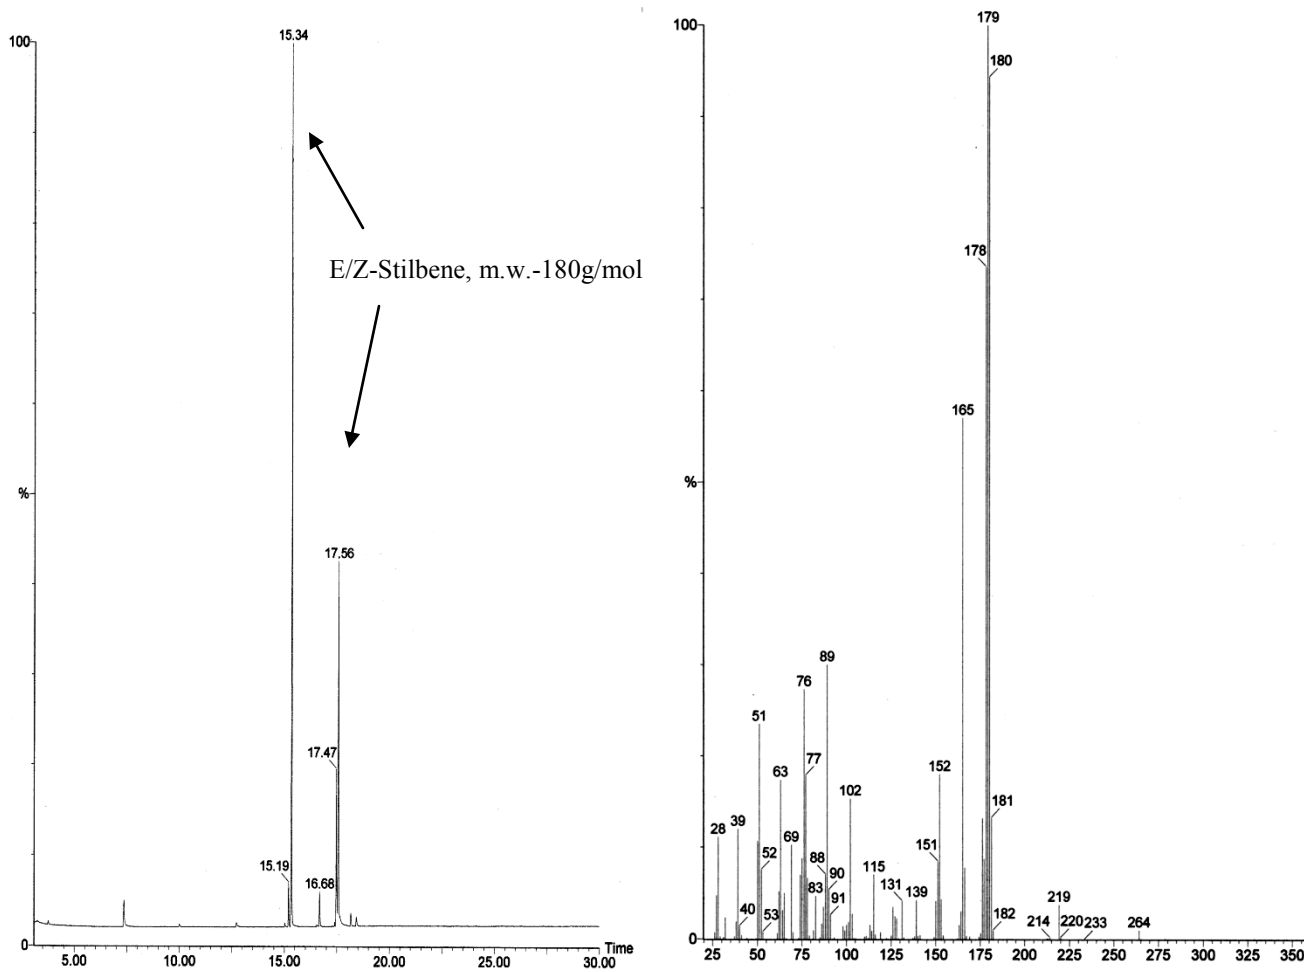

## Characterization of few representative Heck coupling products

**Figure S6**  $^1\text{H}$  and  $^{13}\text{C}$  NMR of Z-1,2-diphenylethene (Stilbene)

$^1\text{H}$  NMR

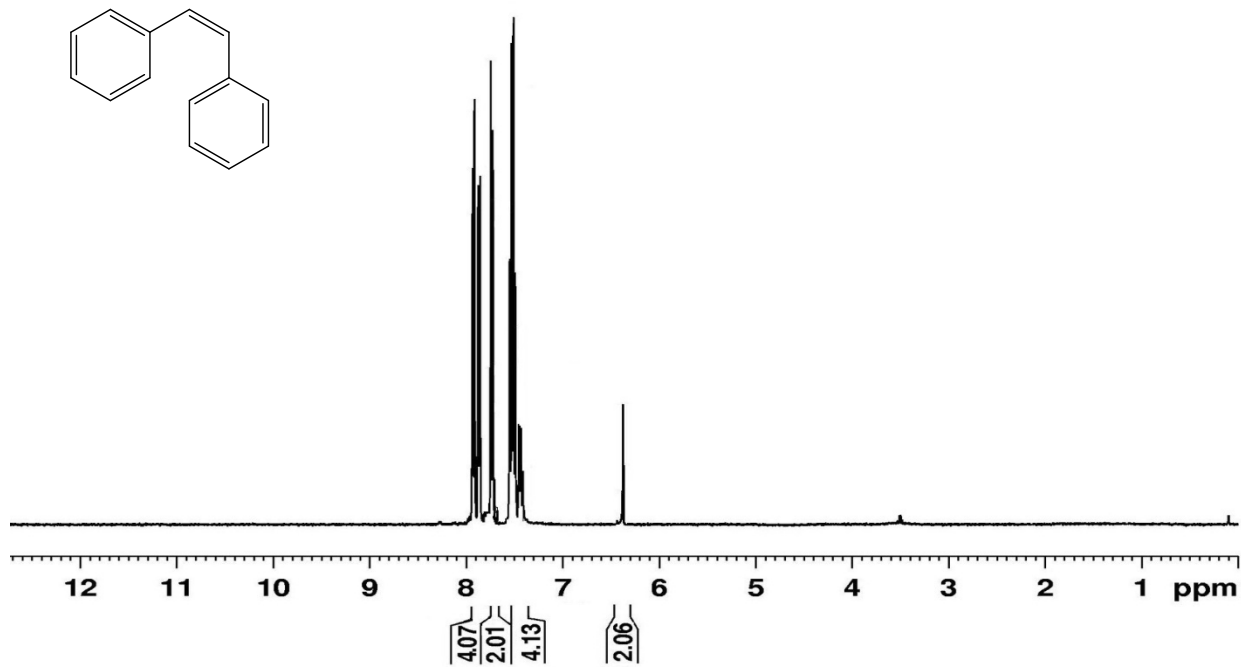

$^{13}\text{C}$  NMR

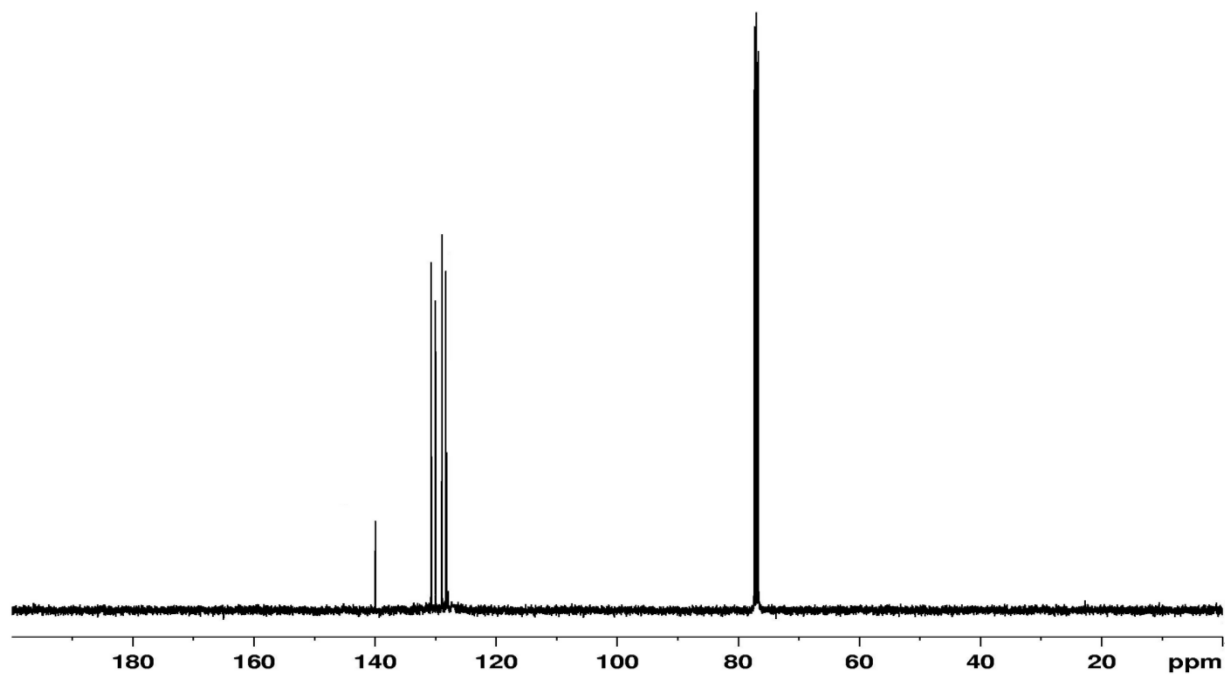

**Figure S7**  $^1\text{H}$  and  $^{13}\text{C}$  NMR of Z-4-(3-tert-butoxy-3-oxoprop-1-enyl)benzoic acid

$^1\text{H}$  NMR

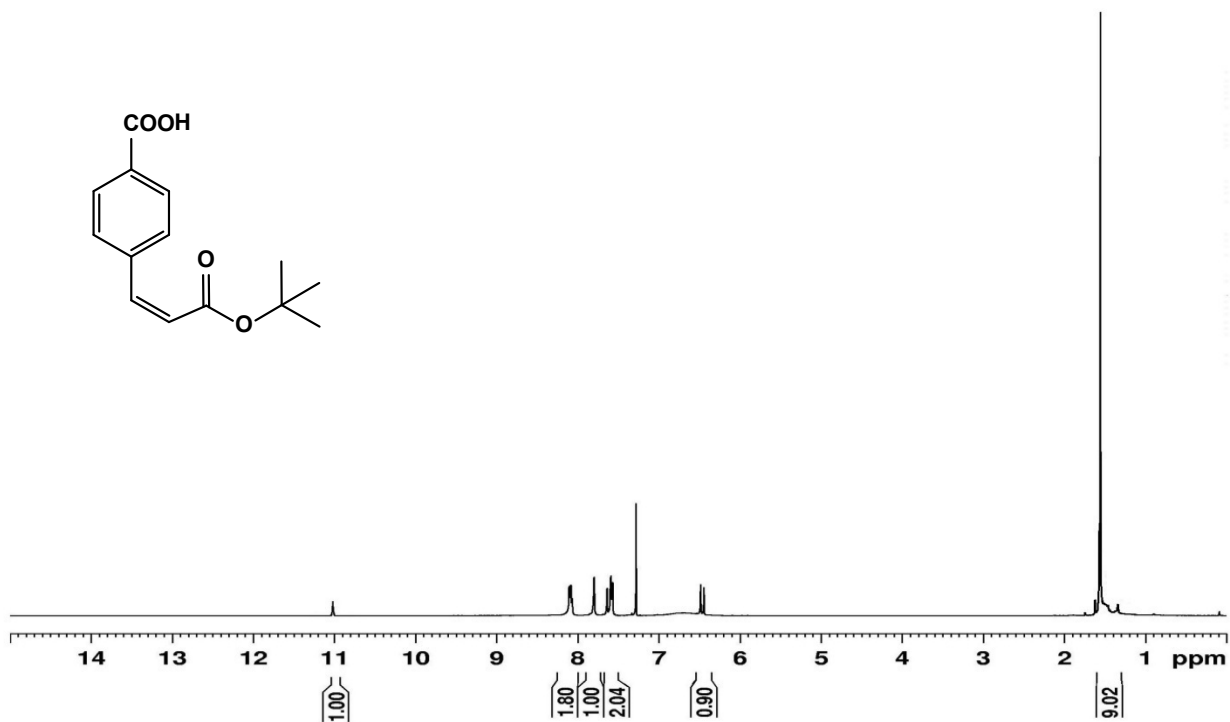

$^{13}\text{C}$  NMR

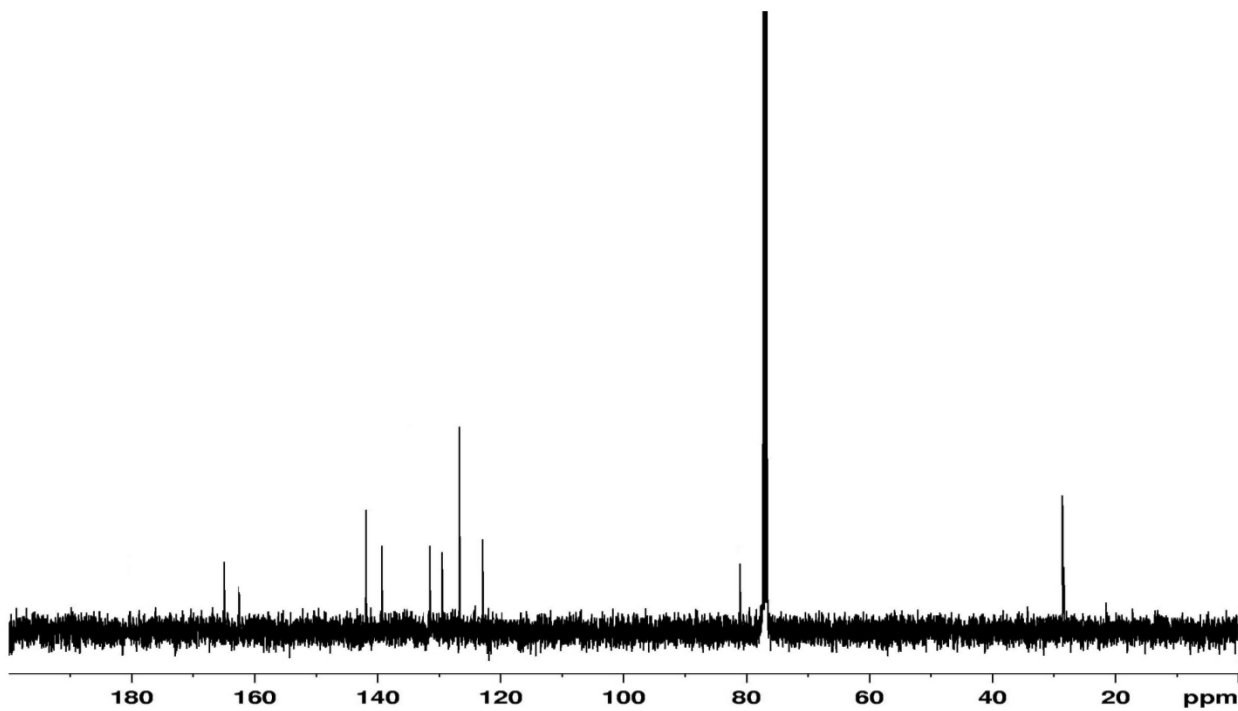

**Figure S8**  $^1\text{H}$  and  $^{13}\text{C}$  NMR of Z-tert-butyl 3-(4-methoxyphenyl)acrylate

$^1\text{H}$  NMR

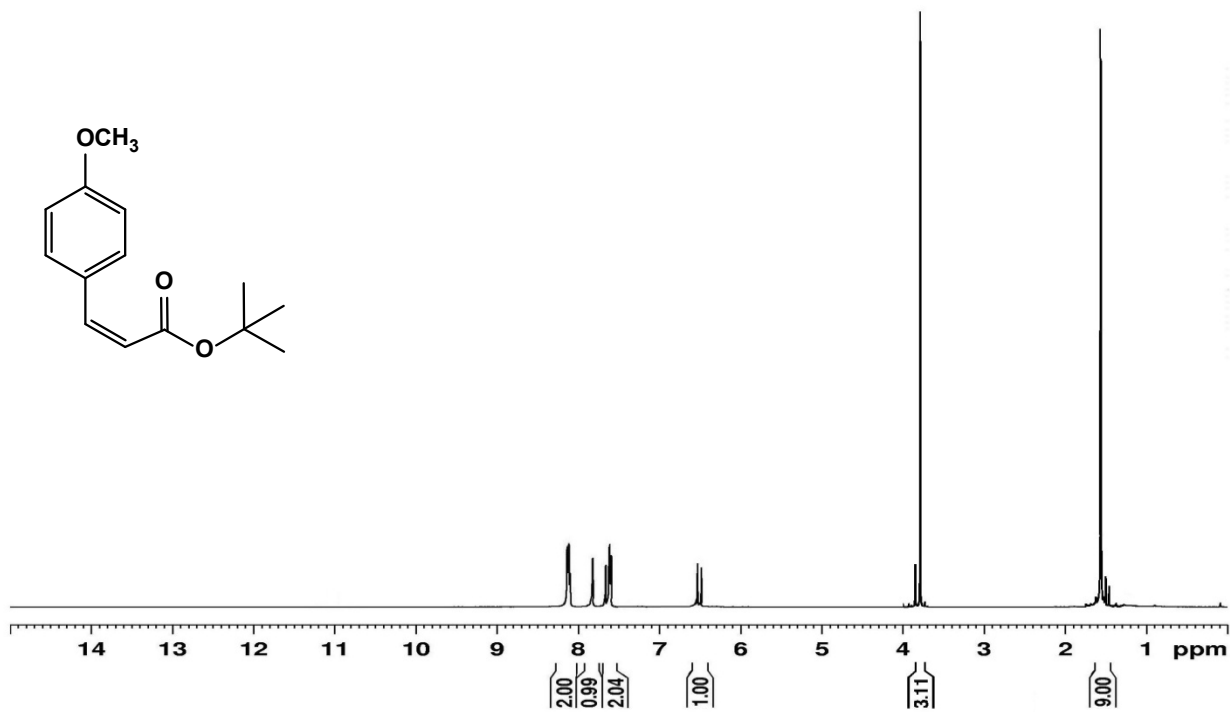

$^{13}\text{C}$  NMR

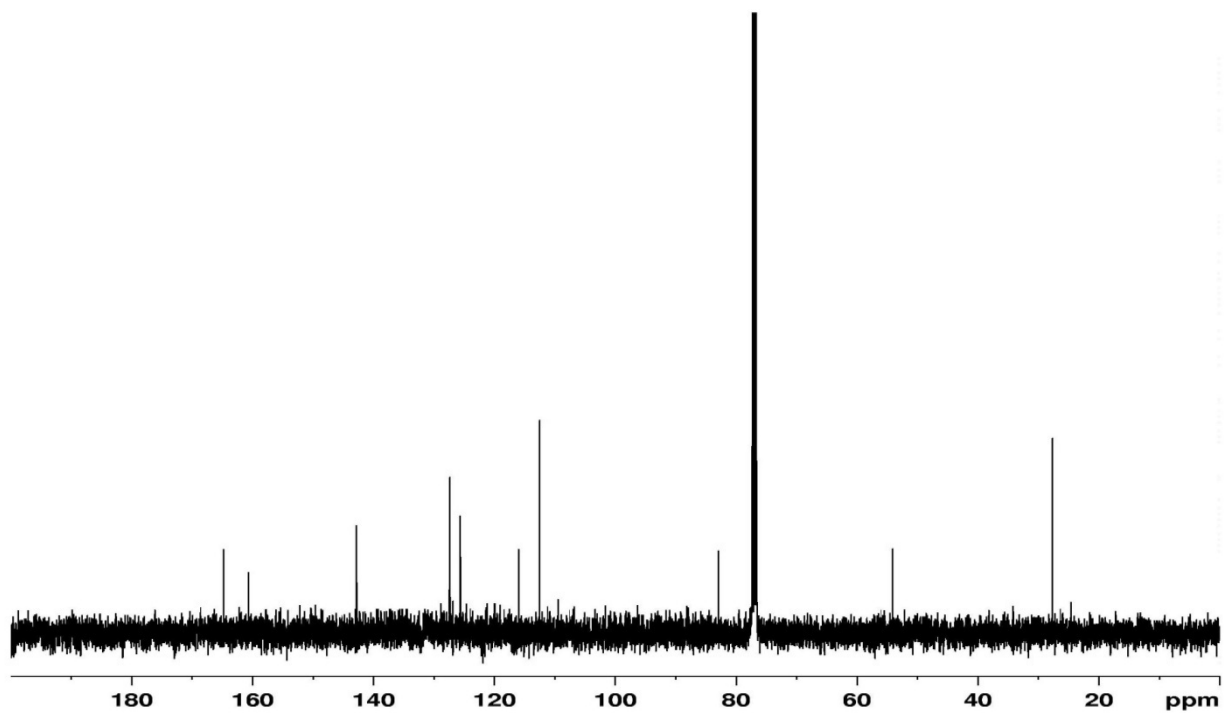

Supplement: c3cy00602f.pdf [file c3cy00602f.pdf]
